# Supplementary material for: Effect of Probiotic Supplementation on Gut Microbiota in Patients with Major Depressive Disorders: A Systematic Review
Source: MDPI journal article supplement (doi:10.3390/nu15061351), 2023-03-10
Supplement: s1 [file s1]

## Supplementary Material S1

**Table S1.** Full search strategy for the various databases

### Search strategy for Medline Search

|                |                                                                                                                                                                          |
|----------------|--------------------------------------------------------------------------------------------------------------------------------------------------------------------------|
| Depression     | exp Depressive Disorder/ or exp Mood Disorders/ or exp Depression/ or (depress* or dysthymi* or "affective disorder*" or "depressive disorder" or MDD or suicide).ti,ab. |
| Gut microbiota | exp Microbiota/ or exp Gastrointestinal Microbiome/ or (microbiota* or gut).ti,ab.                                                                                       |
| Probiotics     | exp Probiotics/ or (probiotic* or lactobacillus or Bifidobacterium).ti,ab.                                                                                               |

### Search strategy for EMBASE

|                |                                                                                                                                                                                                             |
|----------------|-------------------------------------------------------------------------------------------------------------------------------------------------------------------------------------------------------------|
| Depression     | 'mood disorder'/exp OR 'mood disorder' OR 'depression'/exp OR 'depression' OR depress*:ti,ab OR dysthymi*:ti,ab OR 'affective disorder*':ti,ab OR 'depressive disorder':ti,ab OR mdd:ti,ab OR suicide:ti,ab |
| Gut microbiota | 'intestine flora'/exp OR 'intestine flora' OR microbiota*:ti,ab OR gut:ti,ab                                                                                                                                |
| Probiotics     | 'probiotic agent'/exp OR 'probiotic agent' OR probiotic*:ti,ab OR lactobacillus:ti,ab OR bifidobacterium:ti,ab                                                                                              |
| Article Filter | 'article'/it                                                                                                                                                                                                |

## Search strategy for Cochrane Library

|     |                                                                                                        |
|-----|--------------------------------------------------------------------------------------------------------|
| #1  | MeSH descriptor: [Depression] explode all trees                                                        |
| #2  | MeSH descriptor: [Mood Disorders] explode all trees                                                    |
| #3  | MeSH descriptor: [Depressive Disorder] explode all trees                                               |
| #4  | ((depress* or dysthymi* or “affective disorder*” or “depressive disorder” or MDD or suicid*)):ti,ab,kw |
| #5  | MeSH descriptor: [Microbiota] explode all trees                                                        |
| #6  | MeSH descriptor: [Gastrointestinal Microbiome] explode all trees                                       |
| #7  | (microbiota* or gut):ti,ab,kw                                                                          |
| #8  | MeSH descriptor: [Probiotics] explode all trees                                                        |
| #9  | (probiotic* or lactobacillus):ti,ab,kw                                                                 |
| #10 | #1 or #2 or #3 or #4                                                                                   |
| #11 | #5 or #6 or #7                                                                                         |
| #12 | #8 or #9                                                                                               |
| #13 | #10 and #11 and #12                                                                                    |

## Supplementary Material S2

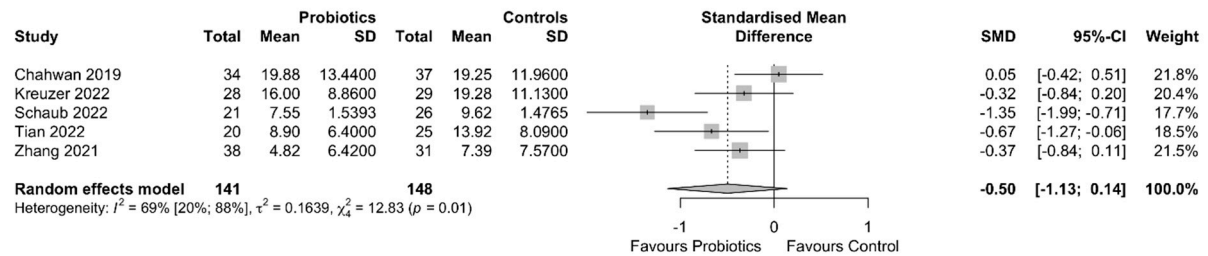

**Figure S1.** Forest plot showing the standardized mean difference for change in depressive rating scales, post-probiotic intervention
